# Supplementary material
Source: PubMed Central journal article supplement (PMC3134945)

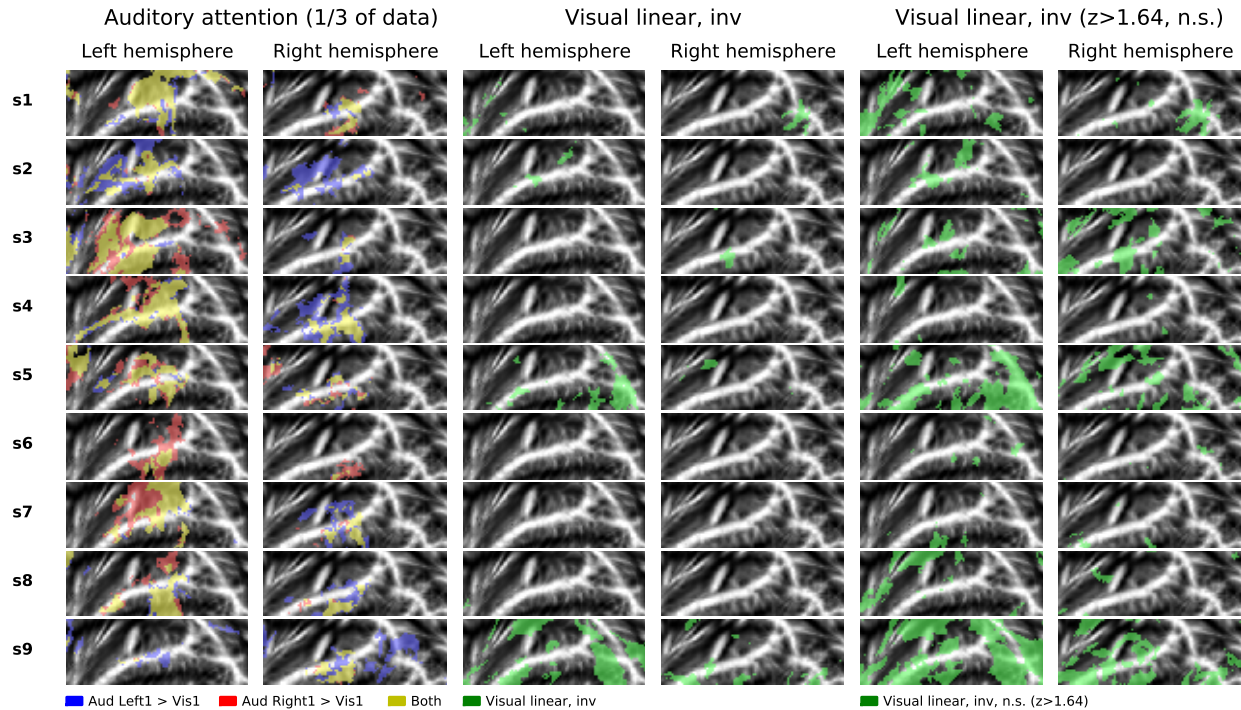

■ Aud Left1 > Vis1   
 ■ Aud Right1 > Vis1   
 ■ Both   
 ■ Visual linear, inv

■ Visual linear, inv, n.s. ( $z > 1.64$ )

Supplement: TONIJ-4-187_SD1.pdf [file TONIJ-4-187_SD1.pdf]
